# Supplementary material for: Bioinformatics Prediction of SARS-CoV-2 Epitopes as Vaccine Candidates for the Colombian Population
Source: MDPI journal article supplement (doi:10.3390/vaccines9070797), 2021-07-17
Supplement: s1 [file s1]

**SUPPLEMENTARY MATERIAL**

| <b>HLAs</b>           | <b>PDB ID</b> |
|-----------------------|---------------|
| <b>HLA I</b>          |               |
| A*01:01               | 4NQX          |
| A*03:01               | 6O9B          |
| A*11:01               | 1X7Q          |
| A*24:02               | 2BCK          |
| A*68:01               | 6PBH          |
| B*07:02               | 5EO0          |
| B*08:01               | 3X13          |
| B*14:02               | 3BVN          |
| B*18:01               | 6MT3          |
| B*35:01               | 1XH3          |
| B*44:02               | 1M6O          |
| B*44:03               | 4JQX          |
| B*51:01               | 5VUE          |
| C*03:04               | 1EFX          |
| C*04:01               | 1QQD          |
| C*05:01               | 5VGD          |
| C*06:02               | 5W67          |
| C*07:02               | 5VGE          |
| <b>HLA II</b>         |               |
| DQA1*01:02/DQB1*06:02 | 6DIG          |
| DQA1*03:01/DQB1*02:01 | 4D8P          |
| DRB1*01:01            | 5V4N          |
| DRB1*1402             | 6ATF          |
| DRB1*15:01            | 5V4M          |
| DRB3*01:01            | 2Q6W          |

**Table S1.** HLAs commonly found in Colombian population with three-dimensional structures available in Protein Data Bank (PDB) used in this study.
